# Supplementary material
Source: Springer Nature journal article supplement (https://www.springermedizin.de/resource/supplementary/12931_2013_1415_MOESM6_ESM.pdf/9425956)

**A** -Acrolein

+Acrolein

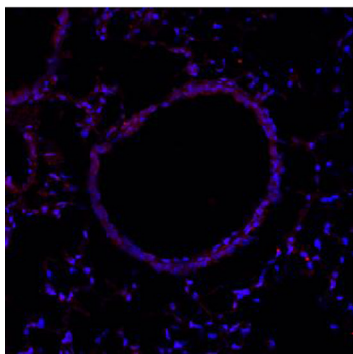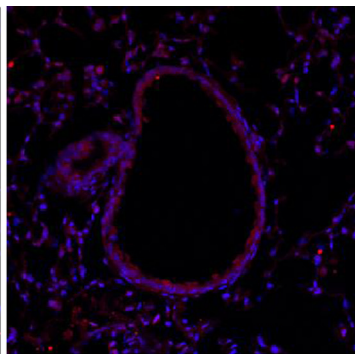

No 1

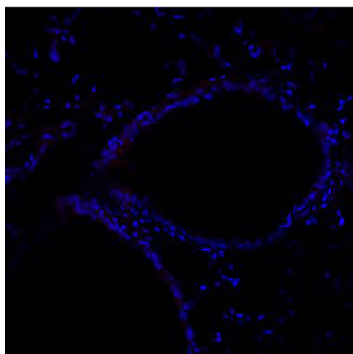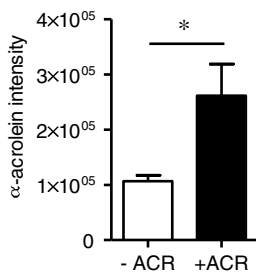**B**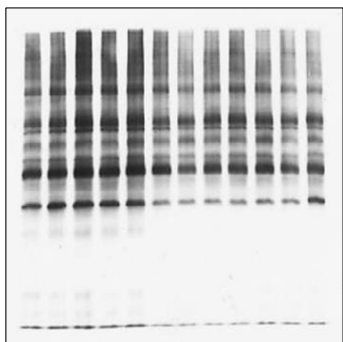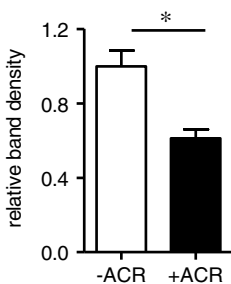

Sham/OVA OVA/OVA Sham/OVA OVA/OVA  
+ ACR

**C**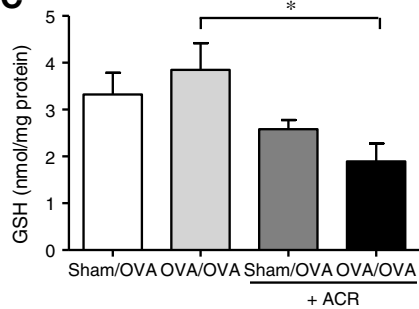

Sham/OVA OVA/OVA Sham/OVA OVA/OVA  
+ ACR

Supplement: MOESM6 [file 9425956]
